# Supplementary material
Source: PubMed Central journal article supplement (PMC8494387)
Supplement: NIHMS1684369-supplement-1.pdf [file NIHMS1684369-supplement-1.pdf]

**Supplement S1.** Technical Details for Isolation of Synovial Fluid Cells from Mouse Knee

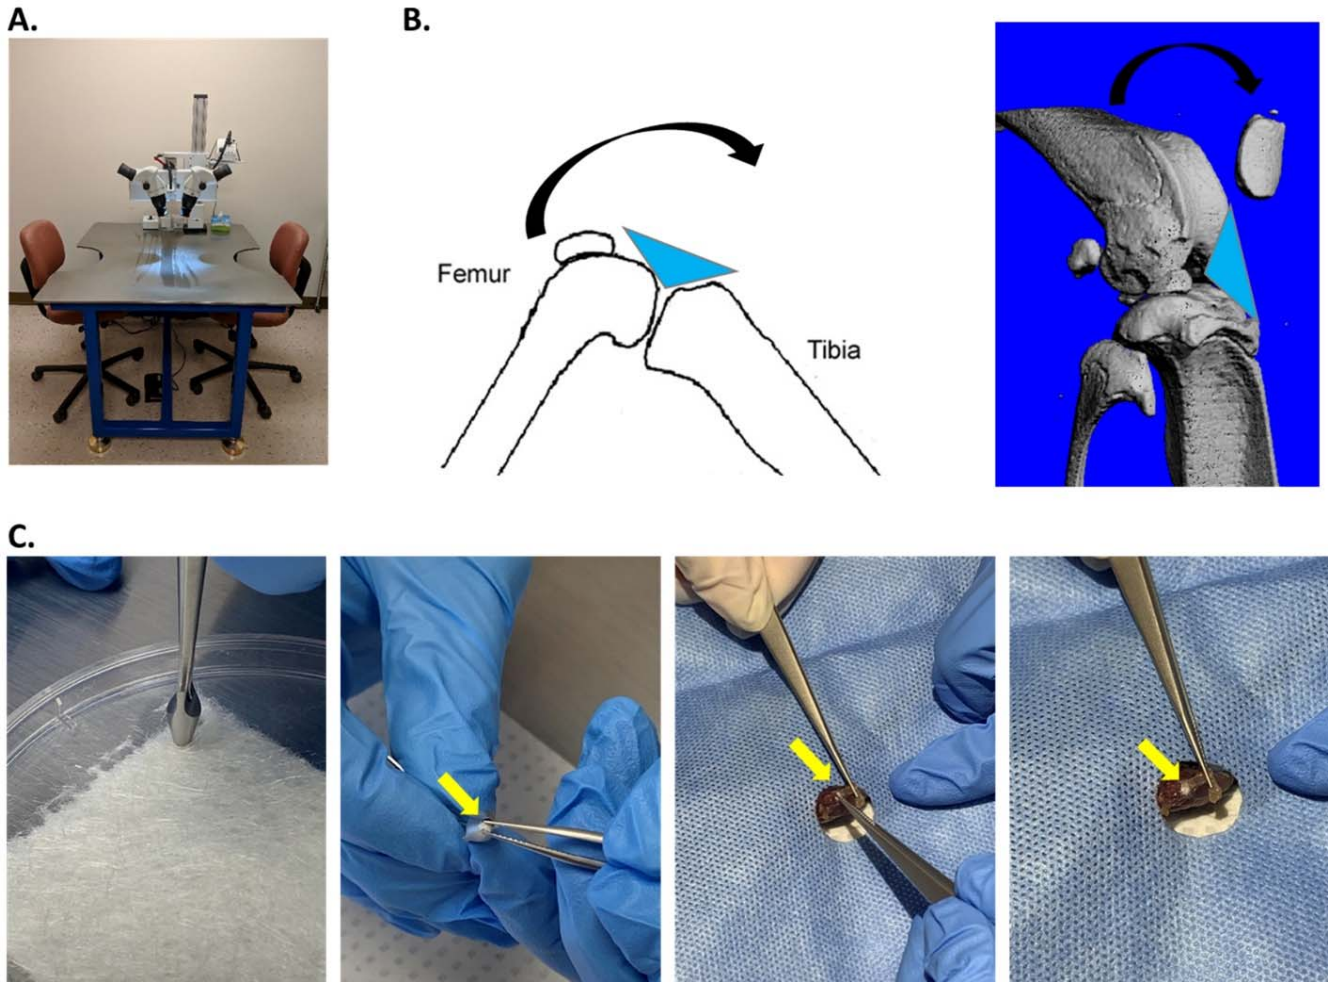

**Figure S1.** Technical Details for Isolation of Synovial Fluid Cells from Mouse Knee. **A)** Olympus custom dual-view Olympus SZ61 stereomicroscopes with motorized focus **B)** Diagram and MicroCT image demonstrating anatomy of mouse knee with resection of patella tendon to open knee joint to access synovial fluid at articular joint space (blue triangle). **C)** 2mm punch of Melgisorb (yellow arrow) being place in knee joint to absorb synovial fluid and cells with patellar tendon pulled distally to open joint space.

**Figure S2. Representative images of IHC staining of mouse limbs.** Standardized images (brown= + stain, blue=hematoxylin counter stain) at Day 7 (**A,B**) and Day 14 (**C,D**) post-fracture (20x). **A,C**) Bone marrow used as internal control for each limb with negative and primary antibody using ImmPRESS HRP Goat Anti-Rat IgG, mouse adsorbed polymer detection kit, MP-7444-15, for rat anti-mouse F4/80 antibody, MCA497G (isotype IgG), and ImmPRESS HRP Horse Anti-Rabbit IgG polymer detection kit, MP-7401, for both rabbit anti-mouse CD4 antibody, ab183685 (isotype IgG) and for rabbit anti-mouse CD8 antibody, ab209775 (isotype IgG). **B,D**) Staining of synovium in contralateral control limbs and fractured limbs from mice with no treatment.

# Day 7

## A.

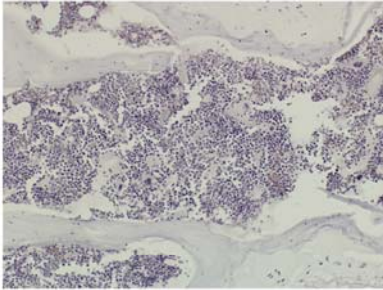

F4/80 Bone marrow Control limb No Tx – negative

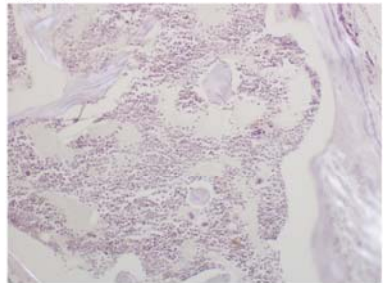

CD4 Bone marrow Control limb No Tx – negative

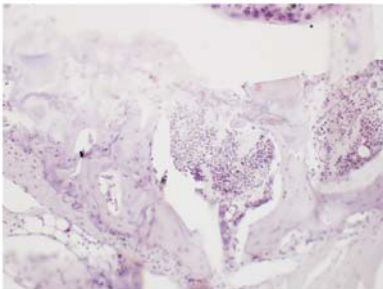

CD8 Bone marrow Control limb No Tx – negative

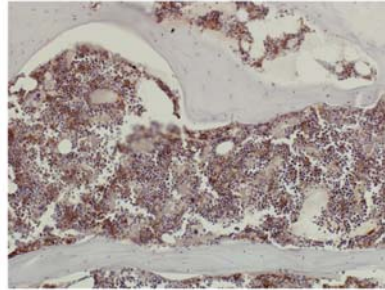

F4/80 Bone marrow Control limb No Tx – primary antibody conc. 3.3 µg/µl

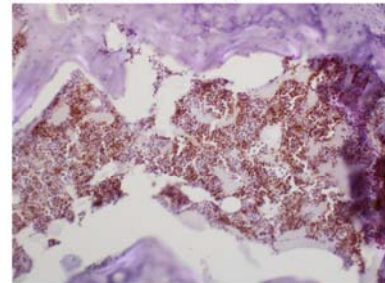

CD4 Bone marrow Control limb No Tx – primary antibody conc. 6.95 µg/µl

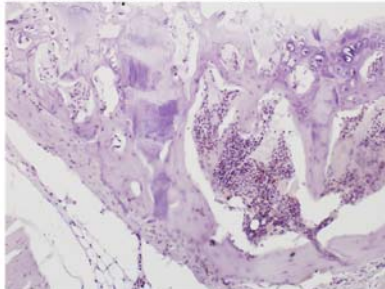

CD8 Bone marrow Control limb No Tx – primary antibody conc. 6.3 µg/µl

## B.

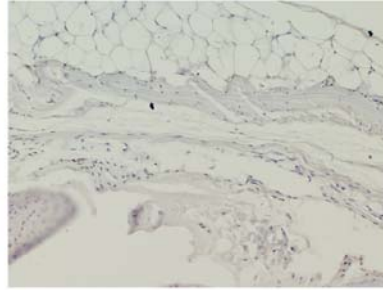

F4/80 Control limb No Tx – primary antibody conc. 3.3 µg/µl

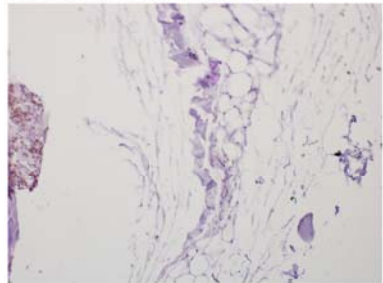

CD4 Control limb No Tx – primary antibody conc. 6.95 µg/µl

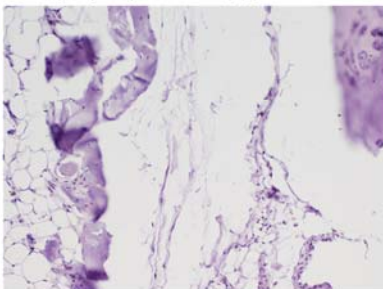

CD8 Control limb No Tx – primary antibody conc. 6.3 µg/µl

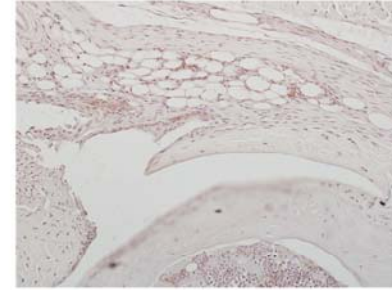

F4/80 Fracture limb No Tx – primary antibody conc. 3.3 µg/µl

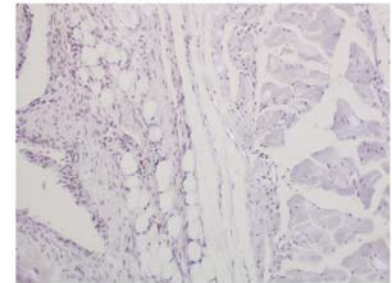

CD4 Fractured limb No Tx – primary antibody conc. 6.95 µg/µl

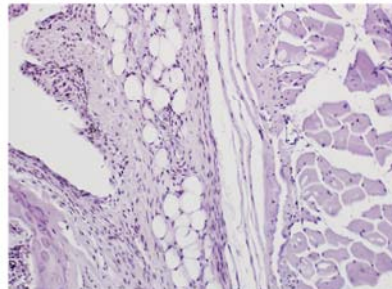

CD8 Fractured limb No Tx – primary antibody conc. 6.3 µg/µl

# Day 14

C.

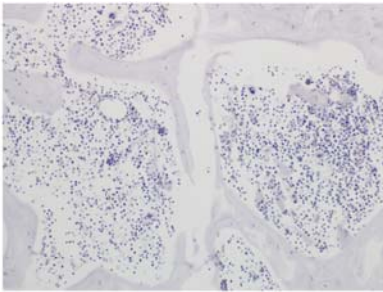

F4/80 Bone marrow Control limb No Tx – negative

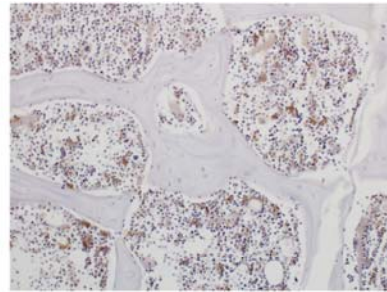

F4/80 Bone marrow Control limb No Tx – primary antibody conc. 3.3 µg/µl

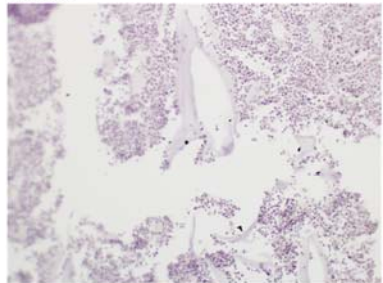

CD4 Bone marrow Control limb No Tx – negative

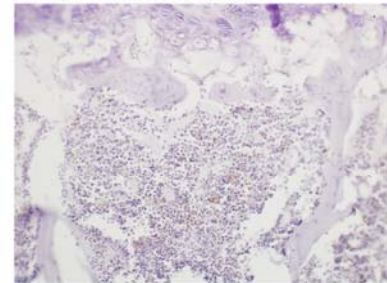

CD4 Bone marrow Control limb No Tx – primary antibody conc. 6.95 µg/µl

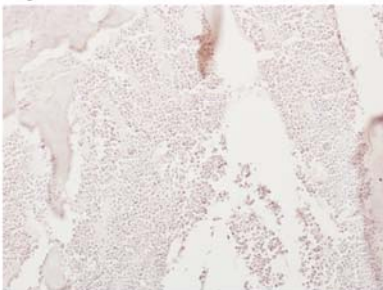

CD8 Bone marrow Control limb No Tx – negative

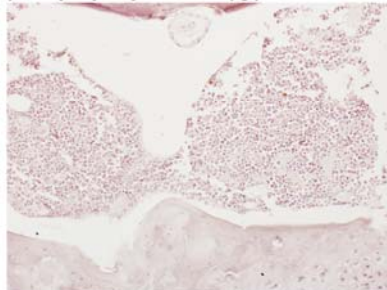

CD8 Bone marrow Control limb No Tx – primary antibody conc. 6.3 µg/µl

D.

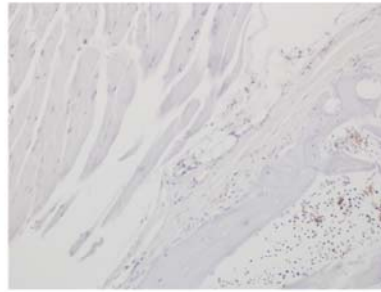

F4/80 Control limb No Tx – primary antibody conc. 3.3 µg/µl

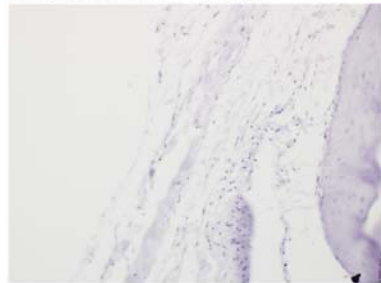

CD4 Control limb No Tx – primary antibody conc. 6.95 µg/µl

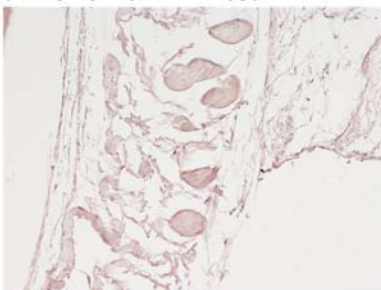

CD8 Control limb No Tx – primary antibody conc. 6.3 µg/µl

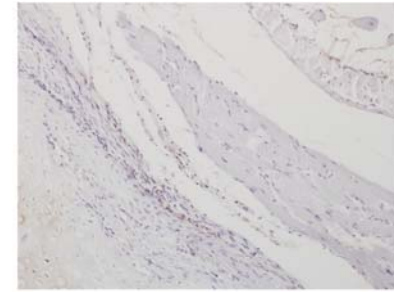

F4/80 Fracture limb No Tx – primary antibody conc. 3.3 µg/µl

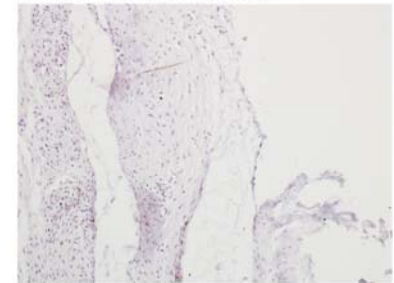

CD4 Fractured limb No Tx – primary antibody conc. 6.95 µg/µl

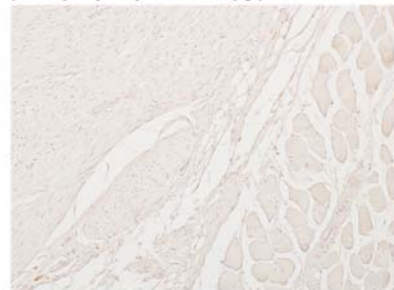

CD8 Fractured limb No Tx – primary antibody conc. 6.3 µg/µl

### Supplement S3.

These findings are valuable in powering future studies to identify immune cell signatures following articular fracture. Based on these data, we determined that a sample size of three synovial fluid samples per group, each sample representing a pool of three animals for a total of 9 mice required, would be needed for 80% power to detect a 20% difference in cell subsets at  $\alpha=0.05$ .

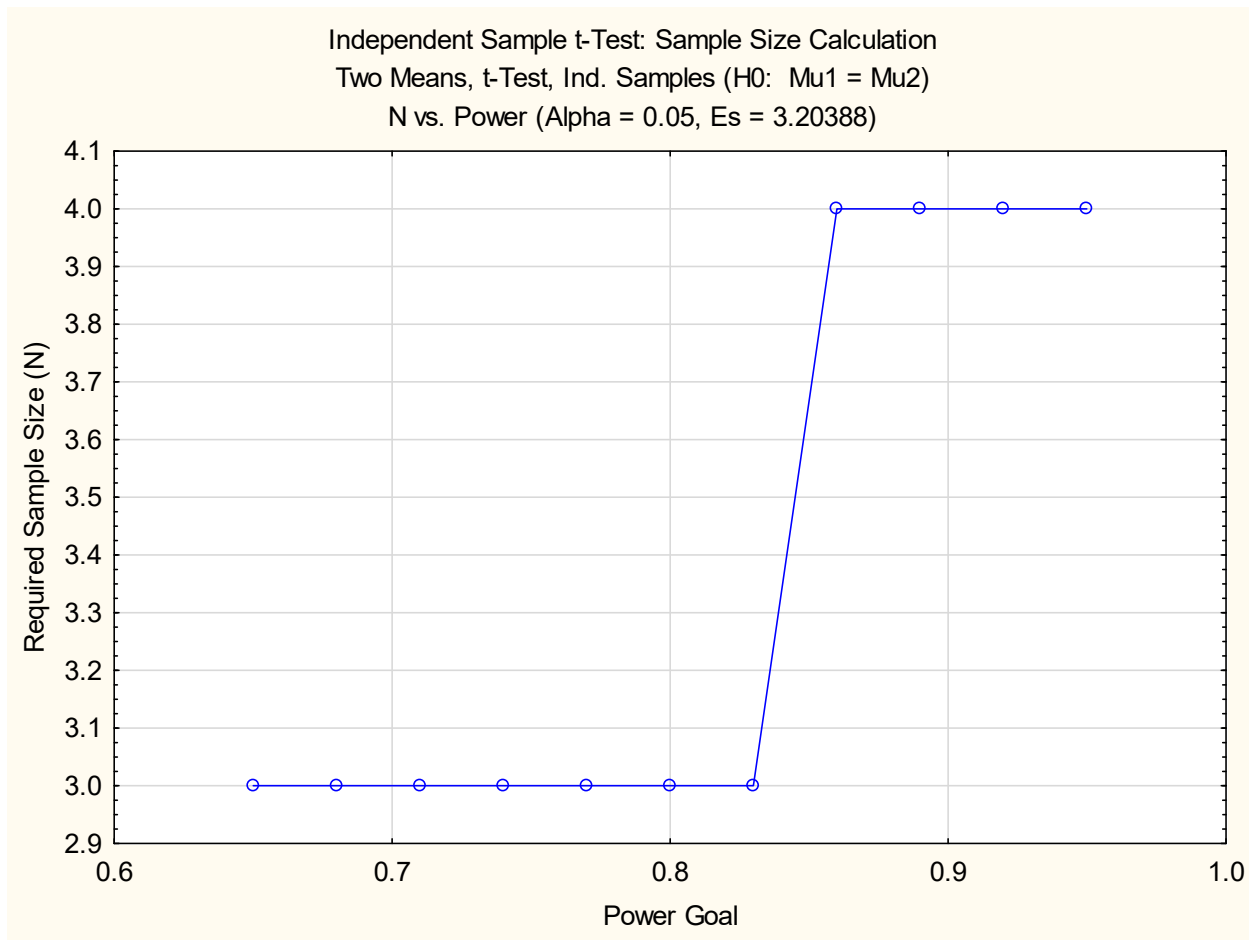

## Supplemental Table S1.

| Group  | Time post-fx (days) | SF (n)                       | Pooled SF Fx Limb B cells (%) | Pooled SF Fx Limb T cells (%) | Pooled SF Fx Limb Non-B&T cells (%) | Pooled SF Fx Limb NK cells (%) | Pooled SF Fx Limb Dendritic cells (%) | Pooled SF Fx Limb Macrophages (%) | Pooled SF Fx Limb Monocytes (%) | WB (n)                     | WB B cells (%) | WB T cells (%) | WB Non-B&T cells (%) | WB NK cells (%) | WB Dendritic cells (%) | WB Macrophages (%) | WB Monocytes (%) |
|--------|---------------------|------------------------------|-------------------------------|-------------------------------|-------------------------------------|--------------------------------|---------------------------------------|-----------------------------------|---------------------------------|----------------------------|----------------|----------------|----------------------|-----------------|------------------------|--------------------|------------------|
| No Tx  | 7                   | n=1<br>(3 pooled)            | 34.7%                         | 13.2%                         | 38.9%                               | 10.9%                          | 18.6%                                 | 30.6%                             | 3.83%                           | n=3                        | 55.0% ± 6.3%   | 25.3% ± 4.6%   | 16.5% ± 2.7%         | 34.5% ± 12.4%   | 7.5% ± 4.0%            | 6.0% ± 2.2%        | 2.6% ± 1.0%      |
| No Tx  | 7                   |                              |                               |                               |                                     |                                |                                       |                                   |                                 |                            |                |                |                      |                 |                        |                    |                  |
| No Tx  | 7                   |                              |                               |                               |                                     |                                |                                       |                                   |                                 |                            |                |                |                      |                 |                        |                    |                  |
| IL-1Ra | 7                   | n=1<br>(3 pooled)            | 28.1%                         | 16.3%                         | 41.8%                               | 11.1%                          | 18.4%                                 | 34.5%                             | 0.45%                           | n=3                        | 54.9% ± 6.6%   | 20.9% ± 4.1%   | 20.7% ± 4.3%         | 35.3% ± 3.5%    | 3.6% ± 1.0%            | 5.4% ± 2.7%        | 2.6% ± 0.5%      |
| IL-1Ra | 7                   |                              |                               |                               |                                     |                                |                                       |                                   |                                 |                            |                |                |                      |                 |                        |                    |                  |
| IL-1Ra | 7                   |                              |                               |                               |                                     |                                |                                       |                                   |                                 |                            |                |                |                      |                 |                        |                    |                  |
|        |                     |                              |                               |                               |                                     |                                |                                       |                                   |                                 | Day 7 Treatment p-value    | p=0.83         | p=0.28         | p=0.13               | p=0.83          | p=0.28                 | p=0.83             | p=0.51           |
| No Tx  | 14                  | n=2<br>(4 pooled per sample) | N/A                           | N/A                           | N/A                                 | N/A                            | N/A                                   | N/A                               | N/A                             | n=8                        | 60.3% ± 2.1%   | 23.6% ± 3.1%   | 11.5% ± 3.3%         | 54.1% ± 13.3%   | 13.0% ± 4.1%           | 12.7% ± 3.9%       | 5.5% ± 1.2%      |
| No Tx  | 14                  |                              |                               |                               |                                     |                                |                                       |                                   |                                 |                            |                |                |                      |                 |                        |                    |                  |
| No Tx  | 14                  |                              |                               |                               |                                     |                                |                                       |                                   |                                 |                            |                |                |                      |                 |                        |                    |                  |
| No Tx  | 14                  |                              |                               |                               |                                     |                                |                                       |                                   |                                 |                            |                |                |                      |                 |                        |                    |                  |
| IL-1Ra | 14                  | n=2<br>(4 pooled per sample) | N/A                           | N/A                           | N/A                                 | N/A                            | N/A                                   | N/A                               | N/A                             | n=8                        | 57.8% ± 6.3%   | 25.7% ± 7.7%   | 11.6% ± 3.8%         | 62.9% ± 13.2%   | 13.4% ± 4.5%           | 13.4% ± 5.9%       | 5.3% ± 2.9%      |
| IL-1Ra | 14                  |                              |                               |                               |                                     |                                |                                       |                                   |                                 |                            |                |                |                      |                 |                        |                    |                  |
| IL-1Ra | 14                  |                              |                               |                               |                                     |                                |                                       |                                   |                                 |                            |                |                |                      |                 |                        |                    |                  |
| IL-1Ra | 14                  |                              |                               |                               |                                     |                                |                                       |                                   |                                 |                            |                |                |                      |                 |                        |                    |                  |
|        |                     |                              |                               |                               |                                     |                                |                                       |                                   |                                 | Day 14 Treatment p-value   | p=0.60         | p=0.67         | p=0.96               | p=0.11          | p=0.92                 | p=0.83             | p=0.34           |
|        |                     |                              |                               |                               |                                     |                                |                                       |                                   |                                 | No Tx Day 7 vs 14 p-value  | p=0.15         | p=0.31         | p=0.07               | p=0.04          | p=0.15                 | p=0.02             | p=0.02           |
|        |                     |                              |                               |                               |                                     |                                |                                       |                                   |                                 | IL-1Ra Day 7 vs 14 p-value | p=0.54         | p=0.41         | p=0.02               | p=0.01          | p=0.01                 | p=0.01             | p=0.02           |

**Table S1. Frequencies of immune cells in mouse knee-derived synovial fluid (SF) and whole blood (WB) following articular fracture.** Comparison of immune cells subsets in synovial fluid and whole blood (mean ± st dev) with and without intra-articular IL-1Ra treatment (Tx) gated on CD45+ for T cells and B cells and Non-B and T cells for remaining cell subsets; N/A indicates cell count, as determined by detectable events, was too low for subset analysis. P-values reported for Mann-Whitney U test between treatment groups and time, independently.
